# Supplementary material for: Machine Learning-Based Predictive Modeling of Postpartum Depression
Source: MDPI journal article supplement (doi:10.3390/jcm9092899), 2020-09-08
Supplement: s1 [file s1]

Article

# Machine learning-based predictive modeling of postpartum depression

## Supplementary Materials

Dayeon Shin <sup>1,§</sup>, Kyung Ju Lee <sup>2,§</sup>, Temidayo Adeluwa <sup>3,§</sup>, and Junguk Hur <sup>3,\*</sup>

<sup>1</sup> Department of Food and Nutrition, Inha University, Incheon, 22212, Republic of Korea; [dyshin@inha.ac.kr](mailto:dyshin@inha.ac.kr)

<sup>2</sup> Department of Obstetrics and Gynecology, Korea University Medical Center, Seoul, 02841, Republic of Korea; [drkj52551@korea.ac.kr](mailto:drkj52551@korea.ac.kr)

<sup>3</sup> Department of Biomedical Sciences, University of North Dakota, Grand Forks, North Dakota, 58202, USA; [temidayo.adeluwa@und.edu](mailto:temidayo.adeluwa@und.edu); [junguk.hur@med.und.edu](mailto:junguk.hur@med.und.edu)

<sup>§</sup> These authors contributed equally to the work.

<sup>\*</sup> Correspondence: [junguk.hur@med.und.edu](mailto:junguk.hur@med.und.edu); Tel.: +1-701-777-6814

**Table S1. RF-based performance evaluation of five data-driven feature selection methods.** RF was used on Set 1 to evaluate the performance.

| Feature selection method      | Number of features | AUC   | Sensitivity | Specificity |
|-------------------------------|--------------------|-------|-------------|-------------|
| Recursive feature elimination | 120                | 0.885 | 0.730       | 0.868       |
| Relief                        | 99                 | 0.885 | 0.729       | 0.870       |
| Information gain              | 119                | 0.884 | 0.725       | 0.871       |
| glmStepAIC                    | 57                 | 0.874 | 0.714       | 0.872       |
| Selection-by-filter           | 66                 | 0.871 | 0.713       | 0.864       |

AUC: Area Under Curve

**Table S2. Classification performance of nine ML algorithms in predicting postpartum depression on Set 1.**

| Model    | AUC   | Sensitivity | Specificity | Accuracy |
|----------|-------|-------------|-------------|----------|
| RF       | 0.881 | 0.726       | 0.868       | 0.789    |
| SVM      | 0.868 | 0.797       | 0.789       | 0.793    |
| GBM      | 0.858 | 0.689       | 0.870       | 0.779    |
| AdaBoost | 0.856 | 0.717       | 0.837       | 0.777    |
| RPART    | 0.785 | 0.648       | 0.810       | 0.726    |
| NB       | 0.783 | 0.59        | 0.831       | 0.671    |
| kNN      | 0.768 | 0.928       | 0.432       | 0.632    |
| LR       | 0.703 | 0.630       | 0.676       | 0.653    |
| NNET     | 0.697 | 0.660       | 0.633       | 0.646    |

AUC: Area Under Curve; RF: Random Forest; GBM: Stochastic Gradient Boosting; SVM: Support Vector Machines; RPART: Recursive Partitioning and Regression Trees; NB: Naïve Bayes; kNN: k-Nearest Neighbor; LR: Logistic Regression; NNET: Neural Network.

**Table S3. Classification performance of nine ML algorithms in predicting postpartum depression on Set 2.**

| Model    | AUC   | Sensitivity | Specificity | Accuracy |
|----------|-------|-------------|-------------|----------|
| RF       | 0.889 | 0.745       | 0.862       | 0.797    |
| SVM      | 0.868 | 0.791       | 0.793       | 0.792    |
| GBM      | 0.863 | 0.708       | 0.864       | 0.785    |
| AdaBoost | 0.861 | 0.733       | 0.831       | 0.782    |
| NB       | 0.805 | 0.588       | 0.852       | 0.683    |
| RPART    | 0.795 | 0.665       | 0.806       | 0.734    |
| kNN      | 0.787 | 0.928       | 0.47        | 0.648    |
| LR       | 0.716 | 0.627       | 0.695       | 0.661    |
| NNET     | 0.712 | 0.648       | 0.674       | 0.656    |

AUC: Area Under Curve; RF: Random Forest; GBM: Stochastic Gradient Boosting; SVM: Support Vector Machines; RPART: Recursive Partitioning and Regression Trees; NB: Naïve Bayes; kNN: k-Nearest Neighbor; LR: Logistic Regression; NNET: Neural Network.

**Table S4. Classification performance of nine ML algorithms in predicting postpartum depression on Set 3.**

| Model | AUC | Sensitivity | Specificity | Accuracy |
|-------|-----|-------------|-------------|----------|
|-------|-----|-------------|-------------|----------|

|          |       |       |       |       |
|----------|-------|-------|-------|-------|
| RF       | 0.881 | 0.726 | 0.865 | 0.788 |
| SVM      | 0.857 | 0.785 | 0.782 | 0.783 |
| GBM      | 0.855 | 0.689 | 0.87  | 0.779 |
| AdaBoost | 0.854 | 0.717 | 0.837 | 0.776 |
| NB       | 0.792 | 0.557 | 0.875 | 0.671 |
| RPART    | 0.786 | 0.661 | 0.806 | 0.732 |
| kNN      | 0.774 | 0.92  | 0.462 | 0.642 |
| LR       | 0.703 | 0.628 | 0.677 | 0.652 |
| NNET     | 0.703 | 0.642 | 0.674 | 0.647 |

AUC: Area Under Curve; RF: Random Forest; GBM: Stochastic Gradient Boosting; SVM: Support Vector Machines; RPART: Recursive Partitioning and Regression Trees; NB: Naïve Bayes; kNN: k-Nearest Neighbor; LR: Logistic Regression; NNET: Neural Network.

**Table S5: Top 20 contributing features in the four best performing models.** Collectively, there were 50 features returned by the top 4 models, ranked by frequency of occurrence in the top 20 features for each model. ‘RF rank’ for BF5WEEKS, for instance, means that the feature was ranked at the 1st in the RF model but ranked at the 3rd in the GBM model. The “Description” column refers to what each feature means or the survey question.

| Features            | Frequency | RF rank | GBM rank | AdaBoost rank | SVM rank | Description from PRAMS                                                  |
|---------------------|-----------|---------|----------|---------------|----------|-------------------------------------------------------------------------|
| BF5WEEKS            | 4         | 2       | 2        | 5             | 3        | Number of weeks spent breastfeeding the baby                            |
| BPG_DEPRS           | 4         | 3       | 3        | 4             | 7        | Depression before pregnancy                                             |
| MAT_AGE_N<br>APHSIS | 4         | 9       | 5        | 13            | 9        | Maternal age grouped                                                    |
| STRS_T_G            | 4         | 1       | 1        | 1             | 1        | Total number of stresses during the 12 months before childbirth grouped |
| INCOME7             | 3         | 6       | 15       | NA            | 2        | Total household income during the 12 months before childbirth           |
| MAT_ED              | 3         | 7       | 8        | NA            | 4        | Maternal education                                                      |
| PRE_DEPR            | 3         | NA      | 12       | 19            | 16       | Pre-pregnancy check for depression/ anxiety                             |
| PREG_TRY            | 3         | NA      | 6        | 6             | 17       | Trying to get pregnant                                                  |
| STRS_BIL            | 3         | 12      | 7        | NA            | 5        | Stress -- couldn't pay rent, mortgage, or other bills                   |
| LTH_HOSP            | 2         | NA      | 16       | 7             | NA       | Hospital baby stay -- length of time                                    |
| MAT_RACE            | 2         | NA      | 4        | 11            | NA       | Maternal race/ethnicity                                                 |
| MM_NOMD             | 2         | NA      | 19       | 17            | NA       | No medical risk factors?                                                |
| PNC_VST_NA<br>PHSIS | 2         | NA      | 18       | 14            | NA       | Number of prenatal care visits grouped                                  |
| PRE_DDS             | 2         | NA      | 20       | 20            | NA       | Pre-pregnancy teeth cleaned                                             |
| SEX                 | 2         | NA      | 9        | 2             | NA       | Gender of infant                                                        |
| VITAMIN             | 2         | NA      | 13       | NA            | 20       | Multivitamin -- Number of times taking a                                |

| Features     | Frequency | RF rank | GBM rank | AdaBoost rank | SVM rank | Description from PRAMS                                                                 |
|--------------|-----------|---------|----------|---------------|----------|----------------------------------------------------------------------------------------|
|              |           |         |          |               |          | multivitamin, a prenatal vitamin, or a folic acid vitamin/week                         |
| WIC_PREG     | 2         | NA      | 10       | NA            | 8        | WIC participation during pregnancy                                                     |
| BC_GEST      | 1         | 5       | NA       | NA            | NA       | Gestational age (Days)                                                                 |
| DDS_TALK     | 1         | NA      | 17       | NA            | NA       | A dental or other health care worker talked about how to care for one's teeth and gums |
| FLUPREG      | 1         | NA      | NA       | 10            | NA       | Flu vaccination during pregnancy                                                       |
| GRAM_NAPHSIS | 1         | 15      | NA       | NA            | NA       | Birth weight grouped into 250-gram intervals                                           |
| HI_MEDIC     | 1         | NA      | NA       | NA            | 15       | Insurance paid by -- Medicaid                                                          |
| HI_WORK      | 1         | NA      | NA       | NA            | 11       | Insurance paid by -- job                                                               |
| IDOB_MTH     | 1         | 17      | NA       | NA            | NA       | Infant birth -- month                                                                  |
| INC_NDEP     | 1         | NA      | NA       | 18            | NA       | Income -- dependents (+self)                                                           |
| INFQ_AGE_MOD | 1         | 4       | NA       | NA            | NA       | Infant age (days) (cleaned version)                                                    |
| INSWORK      | 1         | NA      | NA       | NA            | 10       | Insurance paid by -- job                                                               |
| KOTELCHUCK   | 1         | NA      | NA       | 8             | NA       | Kotelchuck Index                                                                       |
| MM_LMP       | 1         | 19      | NA       | NA            | NA       | Month of last menstrual period                                                         |
| MODECONT     | 1         | NA      | 11       | NA            | NA       | Mode of Contact                                                                        |
| MOM_BMI      | 1         | 13      | NA       | NA            | NA       | Maternal body mass index                                                               |
| MOM_CM       | 1         | 16      | NA       | NA            | NA       | Maternal height -- centimeters                                                         |
| MOM_INCH     | 1         | 20      | NA       | NA            | NA       | Moms height -- inches                                                                  |
| MOM_WT       | 1         | 10      | NA       | NA            | NA       | Maternal weight before pregnancy                                                       |
| MOMLBS       | 1         | 8       | NA       | NA            | NA       | Maternal weight gain                                                                   |
| OTH_TERM     | 1         | NA      | NA       | 9             | NA       | Pregnancy history -- Other terminations?                                               |
| PGWT_GN_DK   | 1         | 11      | NA       | NA            | NA       | Pregnancy weight gain/lost                                                             |
| PNC_1ST      | 1         | 14      | NA       | NA            | NA       | First prenatal care visit -- number                                                    |
| PNC_MTH      | 1         | NA      | NA       | 12            | NA       | Month of first prenatal care visit                                                     |
| PP_MEDIC     | 1         | NA      | NA       | NA            | 6        | Insurance paid by -- Medicaid                                                          |
| PP_WORK      | 1         | NA      | NA       | NA            | 13       | Insurance paid by -- job                                                               |

| Features | Frequency | RF rank | GBM rank | AdaBoost rank | SVM rank | Description from PRAMS                                       |
|----------|-----------|---------|----------|---------------|----------|--------------------------------------------------------------|
| PRE_DIET | 1         | NA      | NA       | 16            | NA       | Pre-pregnancy dieting                                        |
| PRE_EXER | 1         | NA      | NA       | 3             | NA       | Pre-pregnancy exercise 3+ days/week                          |
| SMK6C_NW | 1         | NA      | NA       | NA            | 19       | Changing smoking last 3 months of pregnancy and now          |
| SMK6C_PG | 1         | NA      | NA       | NA            | 14       | Changing smoking during pregnancy                            |
| SMK6C_PP | 1         | NA      | NA       | NA            | 12       | Changing smoking 3 months before pregnancy and now           |
| STRS_DRG | 1         | NA      | NA       | NA            | 18       | Stress -- someone close had a problem with drinking or drugs |
| TLK_DPRS | 1         | NA      | 14       | NA            | NA       | Health care worker talk about depression                     |
| TLK_HIVT | 1         | NA      | NA       | 15            | NA       | Health care worker talk about testing for HIV                |
| TOD_MTH  | 1         | 18      | NA       | NA            | NA       | Today -- month                                               |

NA: Not Available; RF: Random Forest; GBM: Stochastic Gradient Boosting; SVM: Support Vector Machines

**Table S6.** Survey question: Infant living at the time of the PRAMS report.

|     | Postpartum depressed | Healthy |
|-----|----------------------|---------|
| Yes | 7,470                | 48,817  |
| No  | 220                  | 197     |

p-value < 2.2e-16; odds ratio: 7.30; Relative Risk: 3.96
